# Supplementary material
Source: Royal Society of Chemistry journal article supplement (doi:10.1039/d6cp01551d)
Supplement: d6cp01551d1.pdf [file d6cp01551d1.pdf]

## SUPPORTING INFORMATION

### **Three-dimensional electric double layer at solvent-free liquid/liquid interface between two immiscible ionic liquids**

Kazuma Yamaguchi<sup>1</sup>, Kazuya Kobayashi<sup>1</sup>, Kosuke Ishii<sup>2</sup>, Yishan Zhou<sup>1</sup>, Yuko Yokoyama<sup>1</sup>,  
Tetsuo Sakka<sup>1</sup> and Naoya Nishi<sup>1</sup>

<sup>1</sup>*Graduate School of Engineering, Kyoto University, Kyoto 615-8510, Japan,*

<sup>2</sup>*High Energy Accelerator Research Organization, Ibaraki 319-1106 Japan,*

*\*Corresponding author: Naoya Nishi: [nishi.naoya.7e@kyoto-u.ac.jp](mailto:nishi.naoya.7e@kyoto-u.ac.jp)*

## S1. Force field of TOMA<sup>+</sup>

The N atom, the  $\alpha$ - and  $\beta$ -position C and H atoms of the methyl and octyl groups of TOMA<sup>+</sup> were described using the force field of CL&P<sup>[1, 2]</sup>. The C and H atoms from the  $\gamma$ -position onward were modeled using the force field of Jorgensen et al. in 2024<sup>[3]</sup>. C\* and represents CA, CM, C2, CS, and CT. H\* represents either HM or HC.

Fig. S1 Nomenclature of TOMA<sup>+</sup>.

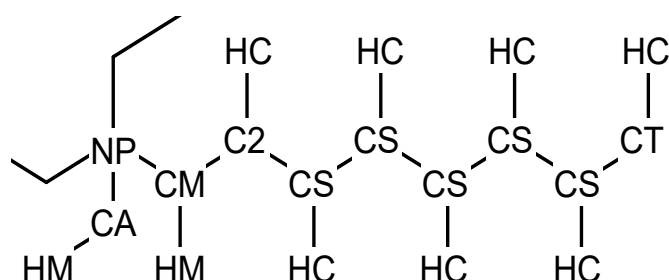

Table S1 Atom parameters of TOMA<sup>+</sup>. The van der Waals potential was described by Lennard-Jones potential,  $4\epsilon\{(\sigma/r)^{12} - (\sigma/r)^6\}$ .

| atom       | $q / e$ | $\sigma / \text{nm}$ | $\epsilon / \text{kJ mol}^{-1}$ |
|------------|---------|----------------------|---------------------------------|
| NP         | 0.096   | 0.325                | 0.71128                         |
| CM, CA, C2 | -0.136  | 0.350                | 0.27614                         |
| C2         | 0.008   | 0.350                | 0.27614                         |
| CS         | -0.096  | 0.350                | 0.27614                         |
| CT         | -0.144  | 0.350                | 0.27614                         |
| HM         | 0.104   | 0.250                | 0.12552                         |
| HC         | 0.048   | 0.250                | 0.12552                         |

Table S2 Bond parameters of TOMA<sup>+</sup>. The bond potential was described by harmonic oscillator potential,  $(k_r/2)(r - r_0)^2$ .

| bond  | $r_0 / \text{nm}$ | $k_r / \text{kJ mol}^{-1} \text{nm}^{-2}$ |
|-------|-------------------|-------------------------------------------|
| NP-C* | 0.1471            | 307100                                    |
| C*-C* | 0.1529            | 224000                                    |
| C*-H* | 0.1090            | constraint                                |

Table S3 Angle parameters of TOMA<sup>+</sup>. The angle potential was described by harmonic oscillator potential,  $(k_{\theta}/2)(\theta - \theta_0)^2$ .

| angle    | $\theta_0$ / deg | $k_{\theta}$ / kJ mol <sup>-1</sup> deg <sup>-2</sup> |
|----------|------------------|-------------------------------------------------------|
| C*-NP-C* | 109.5            | 418.4                                                 |
| NP-C*-H* | 109.5            | 209.2                                                 |
| NP-C*-C* | 109.5            | 669.4                                                 |
| C*-C*-C* | 112.7            | 488.6                                                 |
| C*-C*-H* | 110.7            | 314                                                   |
| H*-C*-H* | 107.8            | 280                                                   |

Table S4 Dihedral parameters of TOMA<sup>+</sup>. The dihedral potential was described by OPLS potential,  $\sum_{m=1}^4 (V_m/2) [1 + \cos(m\phi)]$ .

| dihedral    | $V_1$ / kJ mol <sup>-1</sup> | $V_2$ / kJ mol <sup>-1</sup> | $V_3$ / kJ mol <sup>-1</sup> | $V_4$ / kJ mol <sup>-1</sup> |
|-------------|------------------------------|------------------------------|------------------------------|------------------------------|
| NP-CM-C2-HC | -4.2384                      | -2.9665                      | 1.9790                       | 0.0000                       |
| NP-CM-C2-CS | 10.0081                      | -2.8200                      | 2.3012                       | 0.0000                       |
| C*-NP-CM-C2 | 1.7405                       | -0.5356                      | 2.9079                       | 0.0000                       |
| C*-NP-C*-H* | 0.0000                       | 0.0000                       | 2.3430                       | 0.0000                       |
| C*-C*-C*-C* | 3.5600                       | -0.8370                      | 0.8370                       | 0.0000                       |
| C*-C*-C*-H* | 0.0000                       | 0.0000                       | 1.2600                       | 0.0000                       |
| H*-C*-C*-H* | 0.0000                       | 0.0000                       | 1.2600                       | 0.0000                       |

## S2. Compositions in the system

Table S5 Compositions in the system. The concentration of the aqueous solution was set to 0.56 mol/L for both W phases.

|                              | IL/IL interface | IL/W interface |                       |
|------------------------------|-----------------|----------------|-----------------------|
|                              |                 | W(EAN)         | W(LiNO <sub>3</sub> ) |
| TOMA <sup>+</sup>            | 200             | 200            | 200                   |
| C4C4N <sup>-</sup>           | 200             | 200            | 200                   |
| EA <sup>+</sup>              | 2000            | 100            | 0                     |
| Li <sup>+</sup>              | 0               | 0              | 100                   |
| NO <sub>3</sub> <sup>-</sup> | 2000            | 100            | 100                   |
| water                        | 0               | 10000          | 10000                 |

## S3. Experimentally confirmed polarizability at the IL/IL interface

### S3.1. Synthesis

The hydrophilic IL, EAN, was prepared by mixing ethylamine (70 wt% aqueous solution, TCI) and nitric acid (60wt% aqueous solution, FUJIFILM Wako)<sup>[4]</sup>, while the hydrophobic IL, TOMAC4C4N, was prepared from [TOMA<sup>+</sup>]Cl<sup>-</sup> and Li<sup>+</sup>[C4C4N<sup>-</sup>]<sup>[5]</sup>. [TOMA<sup>+</sup>]Cl<sup>-</sup> was synthesized by the dropwise addition of a dichloromethane solution of methyl chloroformate (TCI) to a dichloromethane solution of trioctylamine (TCI) under an ice-cooling condition. EAN was purified by freeze-drying, and TOMAC4C4N was purified by column chromatography and freeze-drying.

### S3.2. Electrochemical measurement

A micropipette with a tip inner diameter of 20  $\mu\text{m}$  was prepared, Ag/AgCl wires were used as quasi reference electrodes (QREs) in the EAN and TOMAC4C4N phases, according to the procedure described in the reference<sup>[4]</sup>. Cyclic voltammograms (CVs)

were recorded using a two-electrode cell in Fig. S2. The data were corrected by subtracting the  $IR$  drop with a solution resistance of  $150\text{ M}\Omega$ . A CV in Fig. S3 shows that

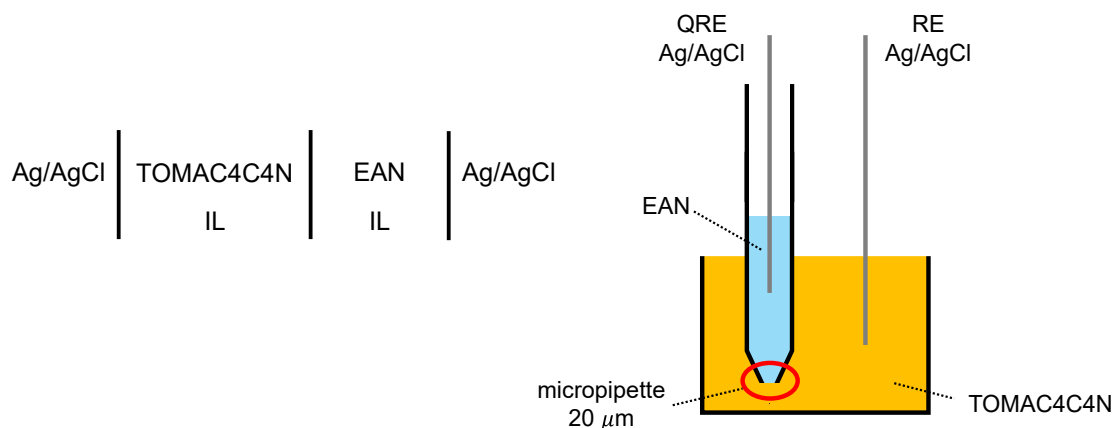

Fig. S2 Cell diagram (left) and schematic of the 2-electrode cell for recording CVs (right) at the TOMAC4C4N/EAN interface.

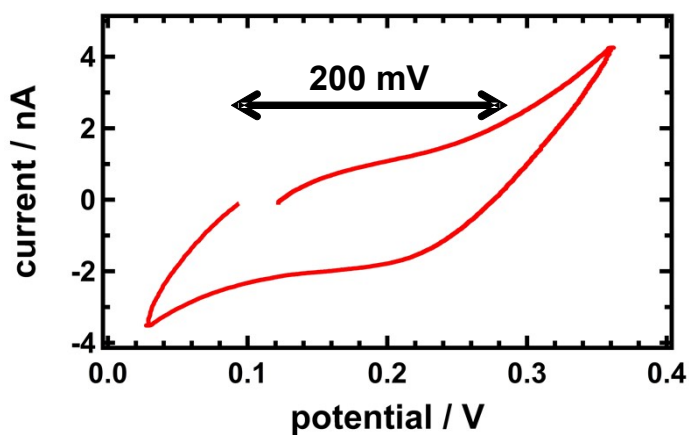

Fig. S3 Cyclic voltammogram at the TOMAC4C4N/EAN interface. The potential window width is 200 mV. The sweep rate was 0.1 V/s.

the TOMAC4C4N/EAN interface was polarizable with a potential window of 200 mV.

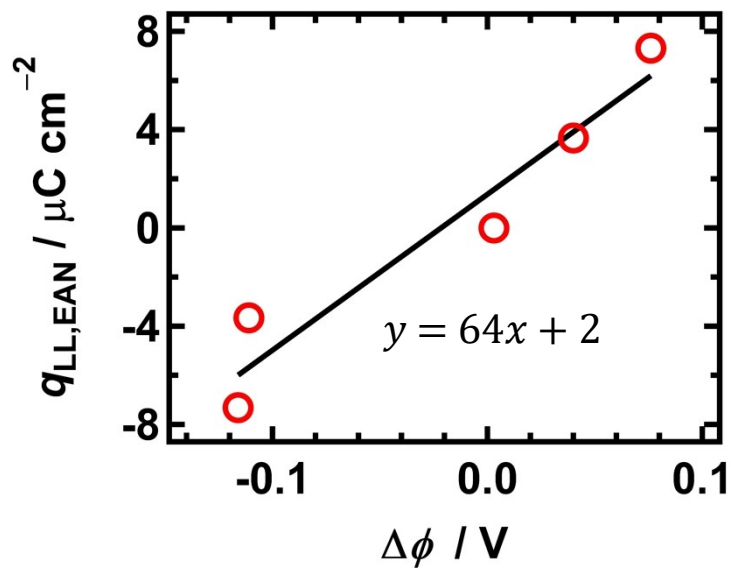

Fig. S4 Relationship between the surface charge density  $q_{LL,EAN}$  and interfacial potential difference  $\Delta\phi$ , MD data (red open circle) and linear approximation (black solid line).

### S3. Capacitance at the IL/IL interface

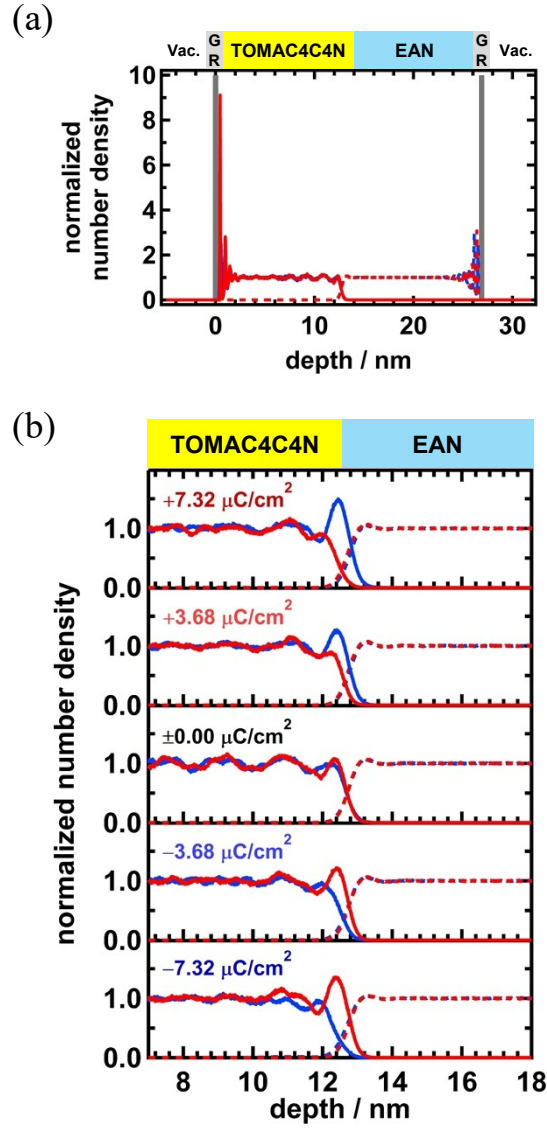

Fig. S5 Number density distribution along the  $z$  axis (a) for overall in the system at  $q_{GR,EAN} = 0.00 \mu\text{C}/\text{cm}^2$ , and (b) at the IL/IL interface at various  $q_{GR,EAN}$ ; the N atom of  $\text{TOMA}^+$  (red),  $\text{C4C4N}^-$  (blue),  $\text{EA}^+$  (red dashed), and  $\text{NO}_3^-$  (blue dashed).

## S4. Number density distribution at the IL/IL interface

## S5. Relationship between the surface charge density of accumulated ions and $q_{GR}$ in the magnitude

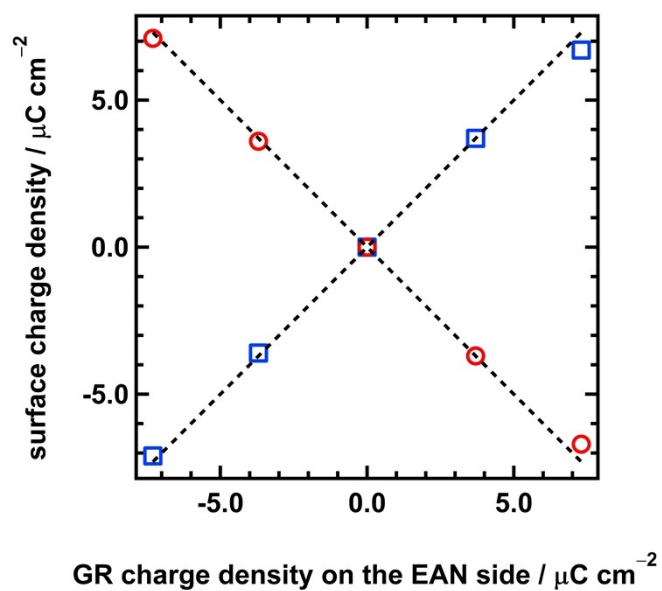

Fig. S6 Surface charge density of accumulated ions on the TOMAC4C4N (red open circle) and EAN (blue open square) sides of the IL/IL interface as a function of  $q_{GR}$ . The surface charge density of accumulated ions was evaluated by integrating the charge density peaks in Fig. 5 from  $z = 10$  to  $15$  nm. The dashed lines are  $y = \pm x$ .

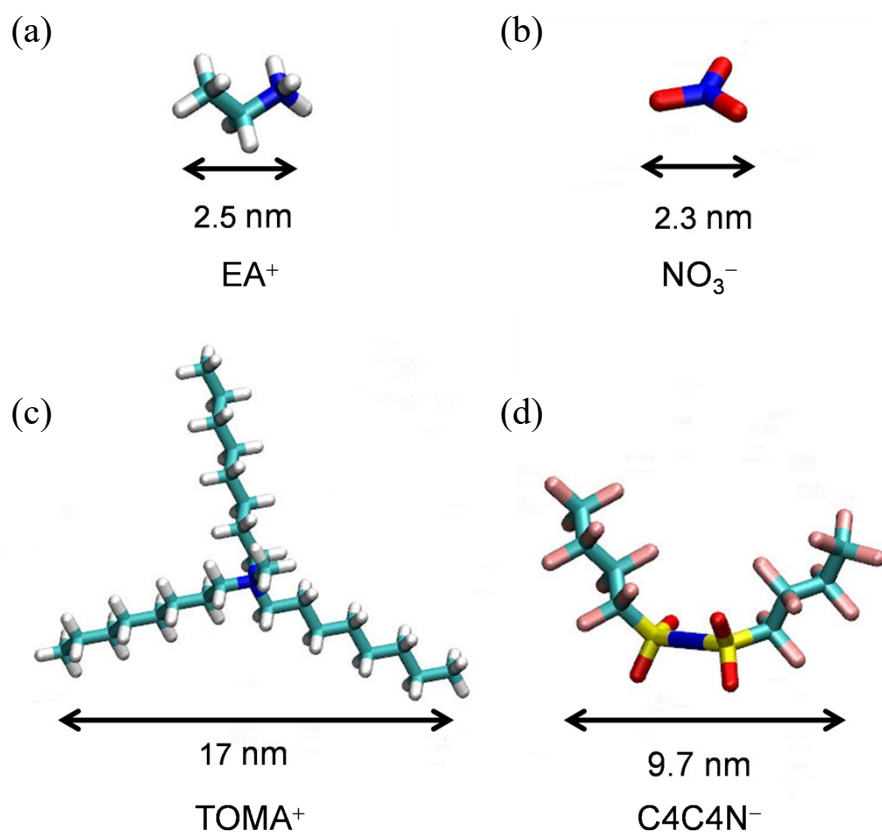

Fig. S7 Ionic size in the system. The double-ended arrows represent the distances between (a) the N atom and the terminal C atom of the ethyl group in EA<sup>+</sup>, (b) the two O atoms in NO<sub>3</sub><sup>-</sup>, (c) the two terminal C atoms of the octyl groups in TOMA<sup>+</sup>, and (d) the two terminal C atoms of the perfluorobutyl groups in C4C4N<sup>-</sup>.

## S6. Ionic size in the system

## S7. Charge density distribution at the IL/W interface

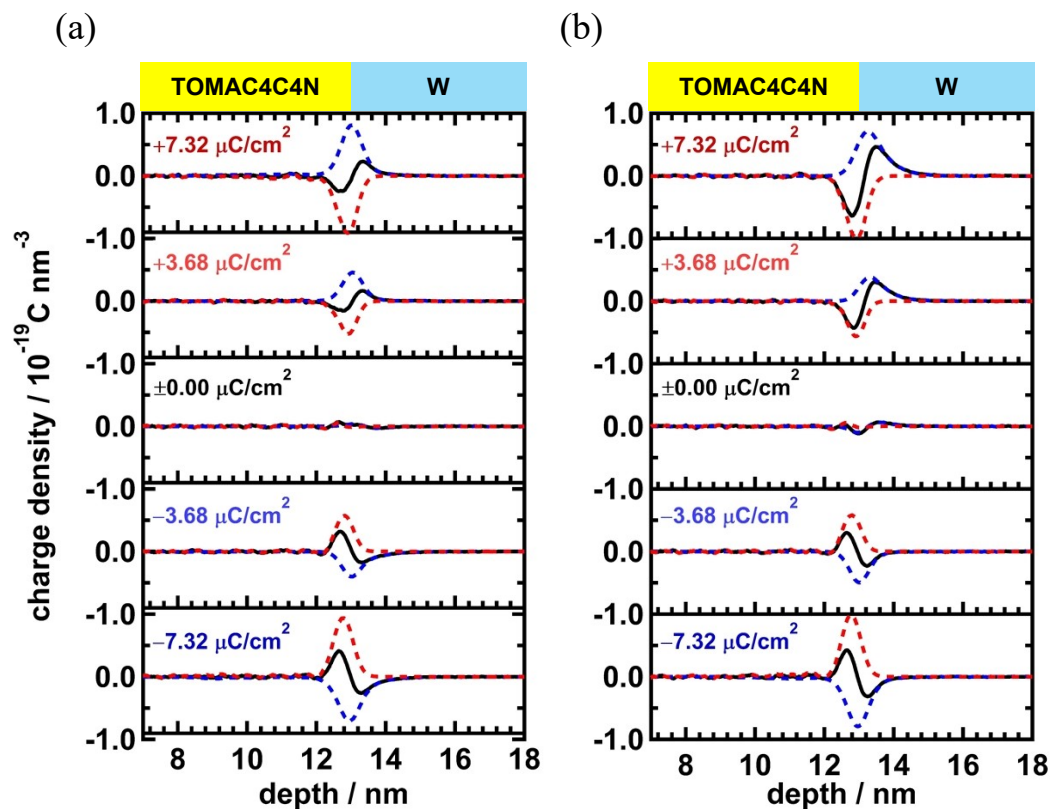

Fig. S8 Charge density distribution along the  $z$ -axis at the (a) TOMAC4C4N/W(EAN) and (b) TOMAC4C4N/W(LiNO<sub>3</sub>) interface for (black) total ions in the system, (red) ions in the TOMAC4C4N phase, (blue) ions in the hydrophilic phase.

## S8. Interfacial roughness at each system

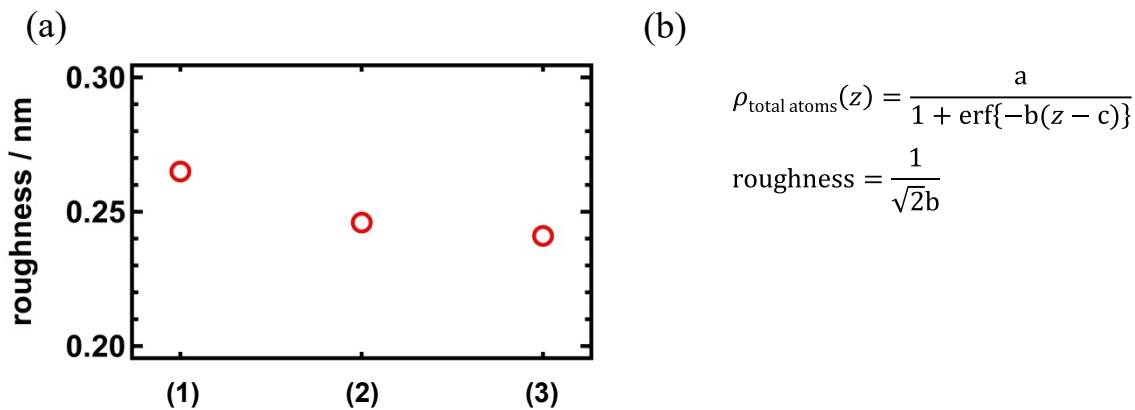

Fig. S9 (a) interfacial roughness at the (1) TOMAC4C4N/EAN, (2) TOMAC4C4N/W(EAN), and (3) TOMAC4C4N/W(LiNO<sub>3</sub>) interfaces at  $q_{GR,EAN} = 0.00 \mu\text{C cm}^{-2}$ , and (b) the fitting function used to evaluate the interfacial roughness.

## S9. Distance of the first coordination shell of NO<sub>3</sub><sup>-</sup> around the TOMA<sup>+</sup>

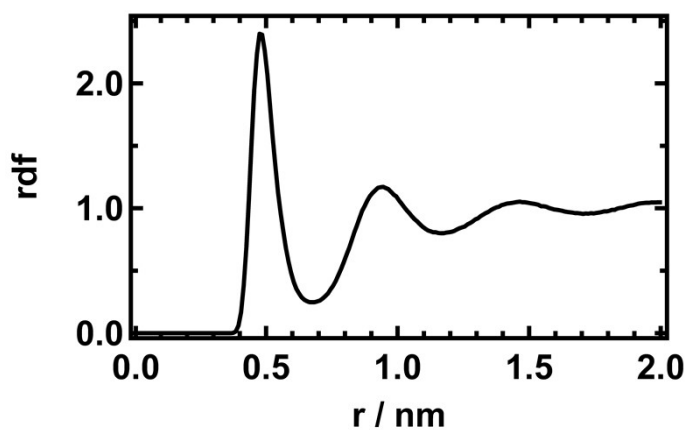

Fig. S10 RDF of the N atom of NO<sub>3</sub><sup>-</sup> around the N atom of TOMA<sup>+</sup> at the (a) TOMAC4C4N/EAN interface. The boundary of the first and second coordination shells of NO<sub>3</sub><sup>-</sup> was at 0.67 nm.

## S10. Interfacial region at the polarizable interface

To calculate the RDF around a center atom at the interface, atoms whose positions are in the interfacial region ( $z$ ) were selected. The interfacial region was defined as the full width at half maximum obtained by fitting the two peaks of the charge density distribution at  $q_{GR} = \pm 3.68 \mu\text{C}/\text{cm}^2$  (Fig. 5) with Lorentzian functions (Fig. S11). The interfacial regions ( $z$ ) at the three interfaces are shown in Table. S6.

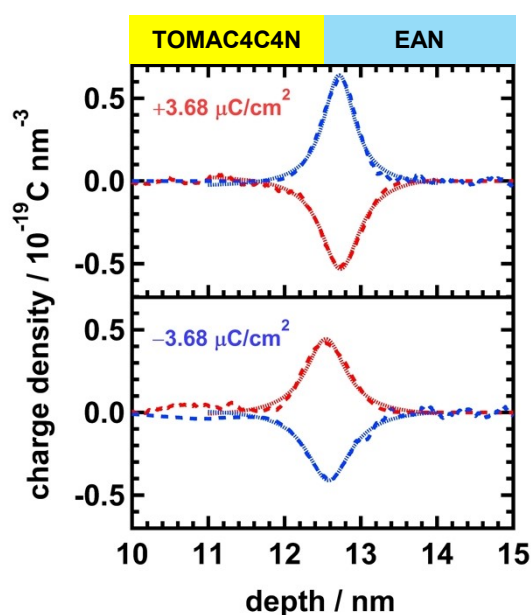

Fig. S11 Fitting the peaks of the charge density distribution at the IL/IL interface. The peaks from MD data (dashed line) and fitting Lorentzian functions (solid line).

Table S6 Interfacial regions at the three interfaces.

| Interface                | Interfacial region ( $z$ ) / nm |
|--------------------------|---------------------------------|
| IL/IL                    | 12.33 ~ 12.95                   |
| IL/W(EAN)                | 12.67 ~ 13.23                   |
| IL/W(LiNO <sub>3</sub> ) | 12.74 ~ 13.31                   |

## S11. EDL structure at the liquid/liquid interface

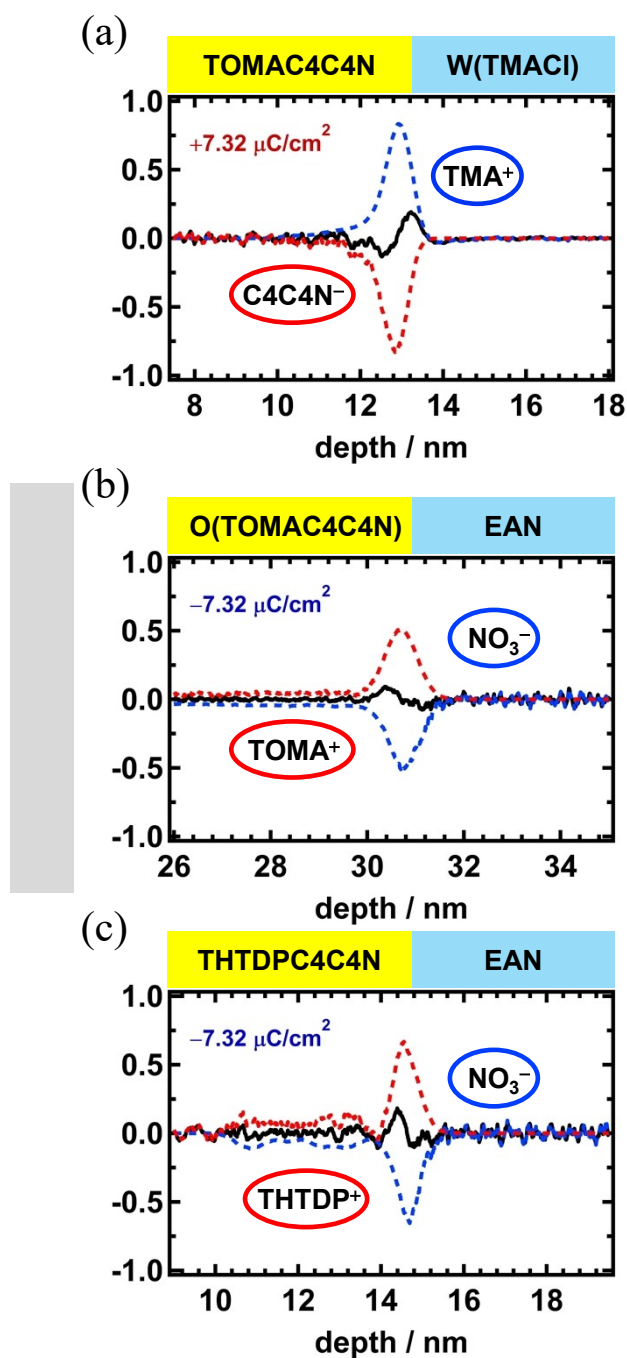

Fig. S12 Charge density distribution along the  $z$ -axis at the (a) IL/W {TOMAC4C4N/W(TMACl)}, (b) O/IL {Toluene(TOMAC4C4N)/EAN}, and (c) IL/IL {THTDPC4C4N/EAN} interface at  $q_{GR,EAN}$  for (black) total ions in the system, (red) ions in the hydrophobic phase, and (blue) ions in the hydrophilic phase.

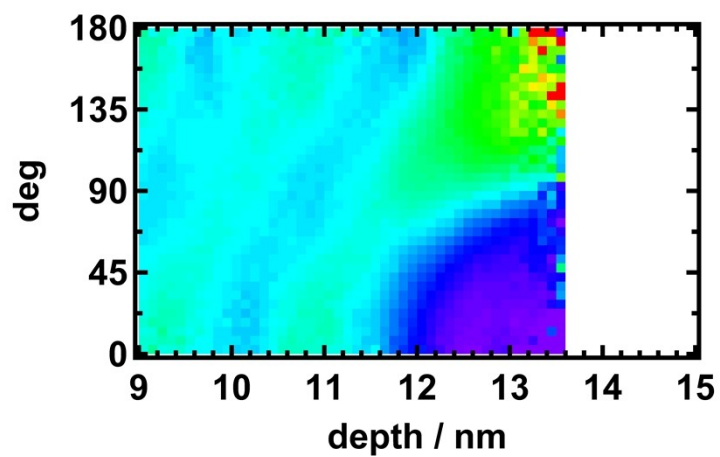

Fig. S13 Two-dimensional mapping of the orientational angle distribution along the  $z$ -axis for the N-C<sub>perfluorobutyl</sub> vectors of C4C4N<sup>-</sup>.

## S12. Orientational correlation dependence of C4C4N<sup>-</sup>

## Reference

- [1] J. N. Canongia Lopes and A. A. H. Pádua, *J. Phys. Chem. B*, 108, 16893 (2004).
- [2] J. N. Canongia Lopes and A. A. H. Pádua, *J. Phys. Chem. B*, 110, 19586 (2006).
- [3] W. L. Jorgensen et al., *J. Phys. Chem. B*, 128, 250 (2023).
- [4] K. Miyazato et al., *J. Electroanal. Chem.*, 954, 118038 (2024).
